# Supplementary material
Source: PubMed Central journal article supplement (PMC10669764)
Supplement: NIHMS1942568-supplement-10.pdf [file NIHMS1942568-supplement-10.pdf]

**Table S1. Roles of bacterial and host factors in dermatitis and itch, Related to Figure 2.**

| <b>BACTERIAL MECHANISMS</b>              |                                                          |                                |                          |
|------------------------------------------|----------------------------------------------------------|--------------------------------|--------------------------|
| <b><i>S. aureus</i> virulence factor</b> | <b>Function</b>                                          | <b>Required for dermatitis</b> | <b>Required for itch</b> |
| Agr                                      | Quorum sensing; regulation of secreted virulence factors | yes                            | yes                      |
| Phenol soluble modulins (Psms)           | Cytolytic toxin                                          | yes                            | no                       |
| Alpha toxin (Hla)                        | Cytolytic toxin                                          | no                             | no                       |
| Staphopains (ScpA, SspB)                 | Cysteine proteases                                       | no                             | no                       |
| Aureolysin (Aur)                         | Metalloprotease                                          | no                             | no                       |
| Serine protease-like proteases (SplA-F)  | Serine proteases                                         | no                             | no                       |
| V8 protease (SspA)                       | Serine protease                                          | yes                            | <b>yes</b>               |

| <b>HOST MECHANISMS</b>                                |                                                                      |                                |                          |
|-------------------------------------------------------|----------------------------------------------------------------------|--------------------------------|--------------------------|
| <b>Host factor</b>                                    | <b>Function</b>                                                      | <b>Required for dermatitis</b> | <b>Required for itch</b> |
| MYD88                                                 | Toll-like receptor signaling                                         | yes                            | no                       |
| C-kit                                                 | C-kit deficient mice lack mast cells                                 | no                             | no                       |
| Basophils                                             | Secretion of endogenous pruritogens (e.g histamine, cytoines)        | no                             | no                       |
| IL31RA                                                | Linked to itch sensation                                             | no                             | no                       |
| IL4RA                                                 | IL13 and IL4 signlaing; linked to itch sensation                     | no                             | no                       |
| RAG2/IL2RG                                            | Lymphocytes                                                          | no                             | no                       |
| MRGPR (Mas-related G coupled receptors)               | Linked to itch sensation                                             | not tested                     | no                       |
| PAR2 (Proteinase-activated receptor 2, <i>F2rl1</i> ) | Activated by proteolytic cleavage; induces calcium influx in neurons | no                             | no                       |
| PAR1 (Proteinase-activated receptor 1, <i>F2r</i> )   | Activated by proteolytic cleavage; induces calcium influx in neurons | no                             | <b>yes</b>               |

**Table S3. Demographic details of organ donors and human subjects involved in this study, Related to STAR Methods.**

| DORSAL ROOT GANGLIA |          |     |         |       |             |
|---------------------|----------|-----|---------|-------|-------------|
| Experiment          | Donor ID | Sex | Age (y) | Race  | COD         |
| RNAScope            | AICP197  | F   | 29      | White | Overdose    |
|                     | AICS171  | M   | 19      | White | Overdose    |
|                     | AIDC291  | M   | 34      | White | Stroke      |
|                     | AIEB188  | F   | 75      | White | Stroke      |
| Calcium imaging     | AJAM174  | F   | 25      | Black | Head Trauma |
|                     | AIKB238  | F   | 43      | White | Anoxia      |

| SKIN SWAB SAMPLES               |            |     |         |                          |
|---------------------------------|------------|-----|---------|--------------------------|
| Group                           | Subject ID | Sex | Age (y) | Race                     |
| Healthy subjects                | H01        | F   | 51      | Hispanic or Latino/White |
|                                 | H02        | F   | 22      | Hispanic or Latino/White |
|                                 | H03        | F   | 40      | Hispanic or Latino/White |
|                                 | H04        | F   | 45      | White                    |
|                                 | H05        | M   | 27      | White                    |
|                                 | H06        | F   | 23      | Asian                    |
|                                 | H07        | F   | 23      | Hispanic or Latino/White |
|                                 | H08        | F   | 31      | Black/White              |
|                                 | H09        | F   | 28      | White                    |
|                                 | H10        | M   | 40      | Asian                    |
|                                 | H11        | F   | 55      | Asian                    |
|                                 | H12        | M   | 58      | Asian                    |
|                                 | H13        | M   | 21      | White                    |
|                                 | H14        | M   | 27      | Hispanic or Latino/White |
| Subjects with atopic dermatitis | AD01       | M   | 44      | Black                    |
|                                 | AD02       | F   | 26      | Asian                    |
|                                 | AD03       | M   | 53      | White                    |
|                                 | AD04       | M   | 23      | Asian                    |
|                                 | AD05       | F   | 21      | Asian                    |
|                                 | AD06       | M   | 40      | White                    |
|                                 | AD07       | F   | 20      | Asian                    |
|                                 | AD08       | M   | 20      | White                    |
|                                 | AD09       | F   | 36      | Hispanic or Latino/White |
|                                 | AD10       | F   | 51      | White                    |
|                                 | AD11       | F   | 21      | White                    |
|                                 | AD12       | M   | 18      | Asian                    |
|                                 | AD13       | F   | 18      | Asian                    |

All samples were collected on the antecubital fossa skin. None of the subjects were undergoing treatment at the time of collection.
